# Supplementary material for: eddy4R: A community-extensible processing, analysis and modeling framework for eddy-covariance data based on R, Git, Docker and HDF5
Source: Copernicus journal article supplement (doi:10.5194/gmd-2016-318), 2017-02-01
Supplement: Supplementary file [file gmd-2016-318-AC1-supplement.pdf]

Author reply to the comment by Executive Editor Astrid Kerkeweg of the manuscript  
gmd-2016-318

**“eddy4R: A community-extensible processing, analysis and modeling framework for eddy-covariance data based on R, Git, Docker and HDF5”**

by S. Metzger et al.

We thank the Executive Editor for catching our oversight regarding "*The main paper must give the model name and version number (or other unique identifier) in the title.*" In response we intend to adjust the manuscript title accordingly: “eddy4R **v1.0.0**: A community-extensible processing, analysis and modeling framework for eddy-covariance data based on R, Git, Docker and HDF5”.

We would value further feedback, and are happy to incorporate additional suggestions.
